# Supplementary material for: Leveraging copper import by yersiniabactin siderophore system for targeted PET imaging of bacteria
Source: JCI journal article supplement (doi:10.1172/jci.insight.144880), 2021-05-23
Supplement: sd1 [file 1]

## **SUPPLEMENTAL DATA**

### **Leveraging Copper Import by Yersiniabactin Siderophore System for Targeted PET Imaging of Bacteria**

Nabil A. Siddiqui<sup>1</sup>, Hailey A. Houson<sup>2</sup>, Nitin S. Kamble<sup>1</sup>, Jose R. Blanco<sup>2</sup>, Robert E. O'Donnell<sup>3</sup>, Daniel J. Hassett<sup>4</sup>, Suzanne E. Lapi<sup>2</sup> & Nalinikanth Kotagiri<sup>1\*</sup>

<sup>1</sup>Division of Pharmaceutical Sciences, James L. Winkle College of Pharmacy, University of Cincinnati, Cincinnati, Ohio, USA

<sup>2</sup>Division of Advanced Medical Imaging Research, Department of Radiology and Chemistry, University of Alabama at Birmingham, Birmingham, Alabama, USA

<sup>3</sup>Department of Internal Medicine, Heart, Lung and Vascular Institute, University of Cincinnati, Cincinnati, Ohio, USA

<sup>4</sup>Department of Molecular Genetics, Biochemistry and Microbiology, College of Medicine, University of Cincinnati, Cincinnati, Ohio, USA

\*Corresponding author.

## Supplemental Figure 1

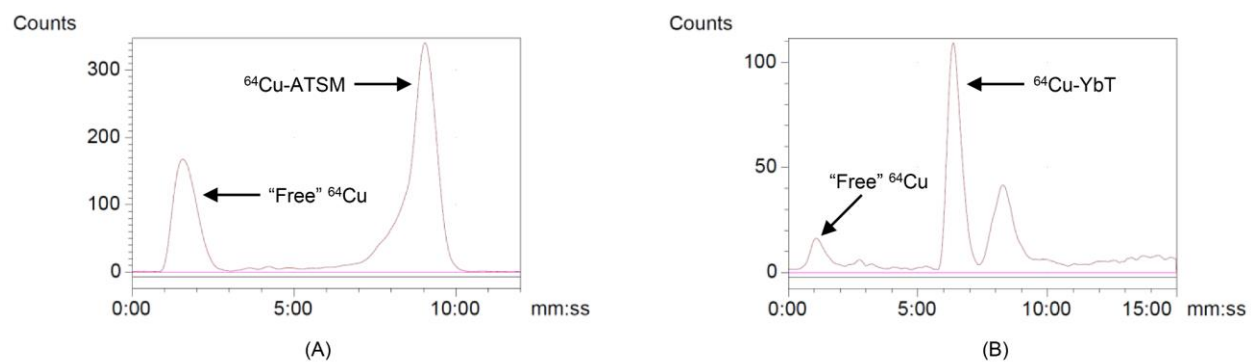

**Supplemental Figure 1. HPLC analyses.** Radio-chromatograms of (A) freshly prepared  $^{64}\text{Cu}$ -ATSM and (B)  $^{64}\text{Cu}$ -YbT in mouse serum 4 hrs after incubation.

## Supplemental Figure 2

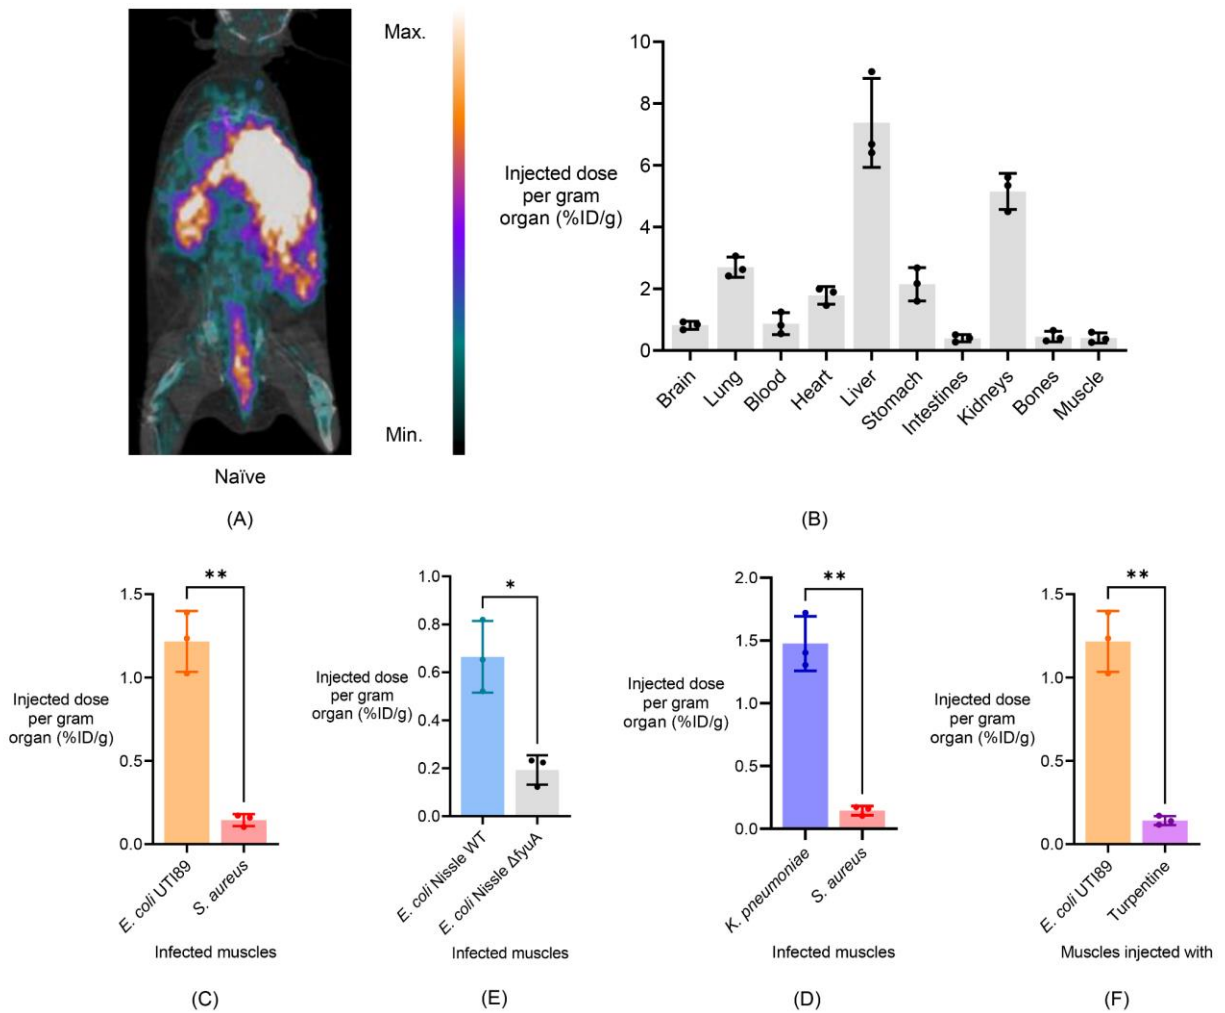

**Supplemental Figure 2. *In vivo* profile of  $^{64}\text{Cu}$ -YbT. (A) PET/CT image and (B) ex vivo biodistribution in major organs of naïve mice.  $^{64}\text{Cu}$ -YbT accumulation (t = 24 hrs) in mice muscles injected with: (C) *E. coli* UT189 and *S. aureus* (D) *E. coli* Nissle wild-type (WT) and *E. coli* Nissle *FyuA* knock-out mutant ( $\Delta$ *fyuA*) (E) *K. pneumoniae* and *S. aureus* and (F) *E. coli* UT189 and turpentine. Note: arrows indicate sites of bacterial injection. Data presented as mean  $\pm$  s.d. (n = 3) analyzed by Welch's t-test; \*P < 0.05, \*\*P < 0.01.**

### Supplemental Figure 3

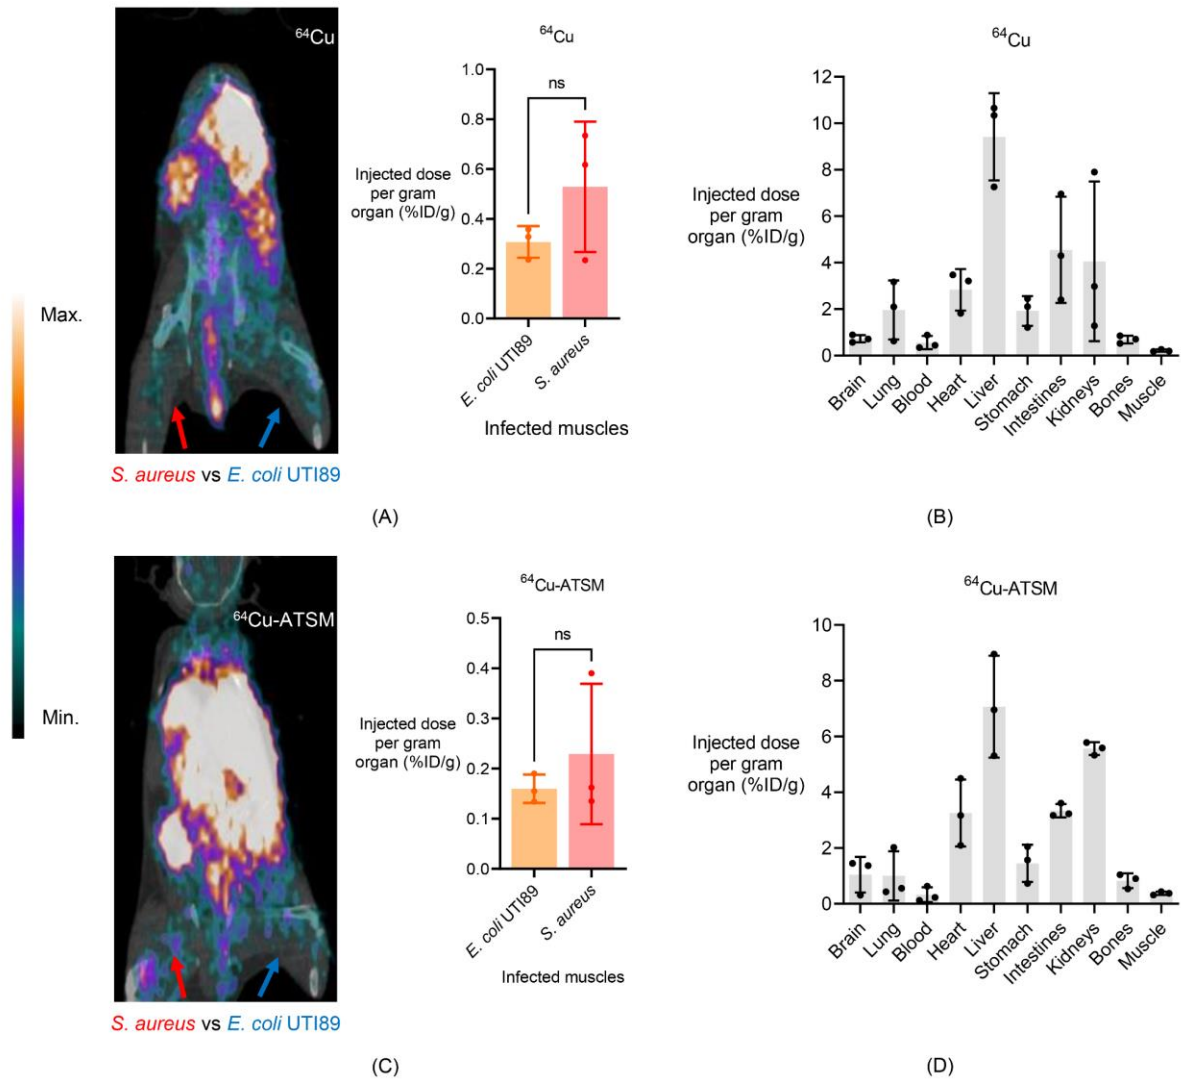

**Supplemental Figure 3. Control  $^{64}\text{Cu}$ -based probes lack bacterial specificity.** PET/CT images with muscle uptakes and biodistribution in major organs of (A and B) Unchelated  $^{64}\text{Cu}$  and (C and D)  $^{64}\text{Cu-ATSM}$  24 hrs post-administration of probes. Note: arrows indicate sites of bacterial injection. Data presented as mean  $\pm$  s.d. (n = 3) analyzed by Welch's t-test; ns: not significant.

## Supplemental Figure 4

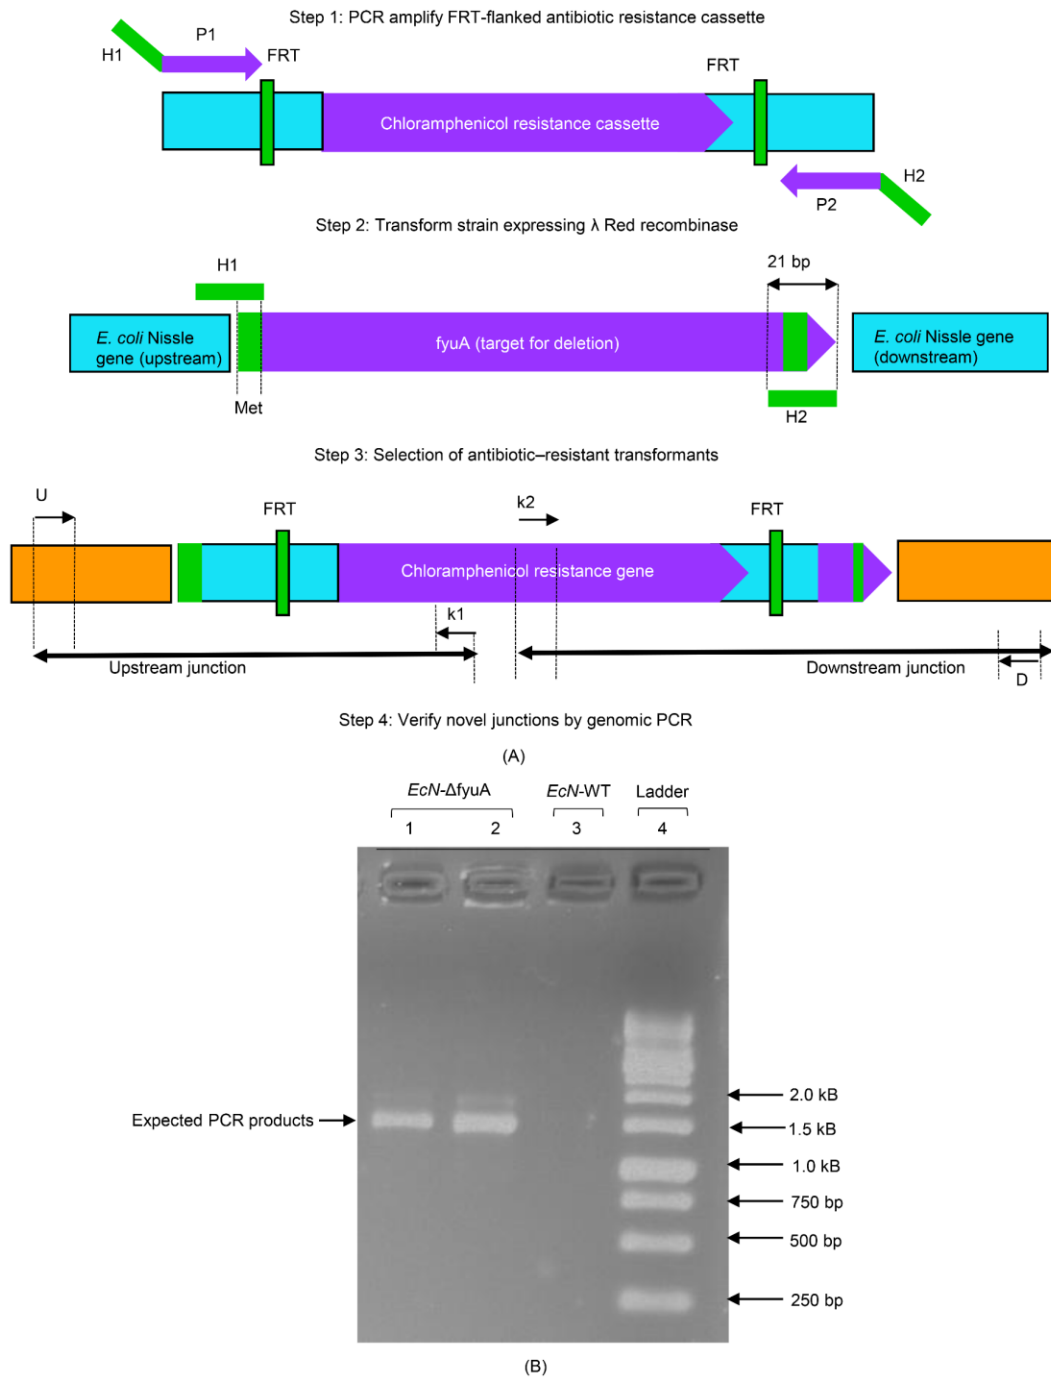

**Supplemental Figure 4. (A)** Schematic of knock-out mutant (KO) generation using λ Red Recombinase method. **(B)** Colony PCR products of *E. coli* Nissle FyuA KO mutant (*EcN-ΔfyuA*, lanes 1 and 2) and *E. coli* Nissle wild-type (*EcN-WT*, lane 3) were run on 1% agarose gel alongside a 1 kB DNA ladder.
